# Supplementary material
Source: MDPI journal article supplement (https://www.mdpi.com/1424-2818/13/7/291)
Supplement: s1 [file s1]

Supplementary 1. List of consulted works for works on rotifer taxonomy. Citations to many previous works can be found in Sarma (1999). Works containing repeated description of the same rotifer species from a given State are excluded. Taxonomic works limiting to only genus level listings are not included. For a given Federal Entity, literature was arranged chronologically. Other consulted literature related to the distribution of rotifers from the different States of Mexico was included in the main text. Geographical coordinates for each state are included following INEGI Mexico.

Aguascalientes (Latitude (La): 22.0000001; Longitude (Lo): -102.5000001)

Rico-Martínez, R.; Silva-Briano, M. Contribution to the knowledge of the rotifera of Mexico. *Hydrobiologia* **1993**, 255/256, 467–474.

Hernández-Rodríguez, M.A.; Santos-Medrano, G.E.; Quintero-Díaz, G.; Rico-Martínez, R. Correlación entre la precipitación pluvial y la densidad y composición del zooplancton de ocho represas del estado de Aguascalientes, México. *Rev. Biol. Trop.* **1999**, 47, 121–127.

Rico-Martínez, R. Rotíferos. In: *La Biodiversidad en Aguascalientes: Estudio de Estado*. Comisión Nacional para el Conocimiento y Uso de la Biodiversidad (CONABIO), Instituto del Medio Ambiente del Estado de Aguascalientes (Imae), Universidad Autónoma de Aguascalientes (UAA). México. **2008**.

Guerrero-Jiménez, G.; Ramos-Rodríguez, E.; Silva-Briano, M.; Adabache-Ortiz, A.; Conde-Porcuna, J.M. Analysis of the morphological structure of diapausing propagules as a potential tool for the identification of rotifer and cladoceran species. *Hydrobiología* **2020**, 847, 243–266.

Campeche (La: 19.3292055; Lo: -89.9439148)

Alvarado-Flores, J.; Arroyo-Castro, J.L.; Chavez-Flores L.; Marin-Chan, A.G. Spatial distribution overview of rotifers in the Yucatán península, México. *Environmental Management & Conservation* **2021**, 7, 1879450.

Chiapas (La: 16.5000001; Lo: -92.5000001)

Fernández, R.; Alcocer, J.; Oseguera, L.A. Regional pelagic rotifer biodiversity in a tropical karst lake district. *Diversity* **2020**, 12, 454.

Chihuahua (La: 28.5000001; Lo: -106.0000001)

Walsh, E.J.; Schröder, T.; Wallace, R.L.; Ríos-Arana, J.V.; Rico-Martínez, R. *Saline Systems* **2008**, 4, 7.

Ríos-Arana, J.V.; Agüero-Reyes, L.delC.; Wallace, R.L.; Walsh, E.J. Limnological characteristics and rotifer community composition of Northern Mexico Chihuahuan desert springs. *J. Arid. Environ.* **2019**, 160, 32–41.

Colima (La: 19.166667; Lo: -104)

Rico-Martínez, R.; Silva-Briano, M. Contribution to the knowledge of the rotifera of Mexico. *Hydrobiologia* **1993**, 255/256, 467–474.

Guanajuato (La: 20.9876996; Lo: -101)

Rico-Martínez, R.; Silva-Briano, M. Contribution to the knowledge of the rotifera of Mexico. *Hydrobiologia* **1993**, 255/256, 467–474.

López-López, E.; Serna-Hernández, J.A. Variación estacional del zooplancton del embalse Ignacio Allende, Guanajuato, México y su relación con el fitoplancton y factores ambientales. *Rev. Biol. Trop.* **1999**, 47 (4), 643–657.

Guerrero-Jiménez, G.; Vannucchi, P.E.; Silva-Briano, M.; Adabache-Ortiz, A.; Rico-Martínez, R.; Roberts, D.; Neilson, R.; Elías-Gutiérrez, M. *Brachionus paranguensis* sp. nov. (Rotifera, Monogononta), a member of the L group of the *Brachionus plicatilis* complex. *ZooKeys* **2019**, 880, 1–23.

Guerrero-Jiménez, G.; Ramos-Rodríguez, E.; Silva-Briano, M.; Adabache-Ortiz, A.; Conde-Porcuna, J.M. Analysis of the morphological structure of diapausing propagules as a potential tool for the identification of rotifer and cladoceran species. *Hydrobiología* **2020**, 847, 243–266.

Guerrero (La: 17.666667; Lo: -100)

Vázquez-Sánchez, A.; Reyes-Vanegas, G.; Nandini, S.; Sarma, S.S.S. Diversity and abundance of rotifers (Rotifera) during an annual cycle in the reservoir Valerio Trujano (Tepecoacuilco, Mexico). *Inland Waters* **2014**, 4, 293–302.

Hidalgo (La: 20.5; Lo: -99)

Serranía-Soto, C.; Sarma, S.S.S. Some taxonomical aspects of Rotifera from Central Mexico. *Scientia Naturae* **2003**, 6, 53–61.

Jalisco (La: 20.3333331; Lo: -103.6666671)

Rico-Martínez, R.; Silva-Briano, M. Contribution to the knowledge of the rotifera of Mexico. *Hydrobiologia* **1993**, 255/256, 467–474.

Mexico City (La: 19.4326296; Lo: -99.1331785)

Serranía-Soto, C.; Sarma, S.S.S. Some taxonomical aspects of Rotifera from Central Mexico. *Scientia Naturae* **2003**, 6, 53–61.

Enríquez-García, C.; Nandini, S.; Sarma, S.S.S. Seasonal dynamics of zooplankton in Lake Huetzalin, Xochimilco (Mexico City, Mexico). *Limnologia* **2009**, 39, 283–291.

Castellanos-Páez, M.E.; Zamora-García, M.; Benítez-Díaz-Mirón, M.I.; Mouriño, G.G.; Contreras-Tapia, R.A. Abundancia y biomasa de la comunidad de rotíferos y su relación con parámetros ambientales en tres estaciones del Canal Cuernavaca, Xochimilco. *Sociedades Rurales, Producción y Medio Ambiente* **2014**, 14 (27), 10–21.

Nandini, S.; Ramírez-García, P.; Sarma, S.S.S. Water quality indicators in Lake Xochimilco, Mexico: zooplankton and *Vibrio cholerae*. *J. Limnol.* **2016**, 75, 91–100.

Jiménez-Contreras, J.; Nandini, S.; Sarma, S.S.S. Diversity of Rotifera (Monogononta) and egg ratio of selected taxa in the canals of Xochimilco (Mexico City). *Wetlands* **2018**, *38*, 1033–1044.

Jiménez-Santos, M.A.; Sarma, S.S.S.; Nandini, S.; Wallace, R.L. Sessile rotifers (Rotifera) exhibit strong seasonality in a shallow, eutrophic, Ramsar Site in Mexico. *Invertebrate Biology* **2019**, *138*, e12270.

Michoacán (La: 19.207098; Lo: -101.878113)

Rico-Martínez, R.; Silva-Briano, M. Contribution to the knowledge of the rotifera of Mexico. *Hydrobiologia* **1993**, *255/256*, 467–474.

Sarma, S.S.S.; Elías-Gutiérrez, M. Rotifers (Rotifera) from four natural water bodies of central Mexico. *Limnologica* **1999**, *29* (4), 475–483.

Ortega-Murillo, M. del R., R. Alvarado-Villanueva, J. D. Sánchez-Heredia, A. A. Muñoz-Gaytán & R. H. Morales. *El plancton de agua dulce*. In: *La biodiversidad en Michoacán*. Estudio de Estado 2. Comisión Nacional para el Conocimiento y Uso de la Biodiversidad (CONABIO). México. 2019.

Morelos (La: 18.75; Lo: -99)

Gómez-Márquez, J.L.; Peña-Mendoza, B.; Guzmán-Santiago, J.L.; Gallardo-Pineda, V. Composición, abundancia del zooplancton y calidad de agua en un micro-reservorio en el estado de Morelos. *Hidrobiológica* **2013**, *23* (2), 227–240.

Nandini, S.; Ramírez-García, P.; Sarma, S.S.S.; Gutiérrez-Ochoa, R.A. Planktonic indicators of water quality: A case study in the Amacuzac River Basin (State of Morelos, Mexico). *River Res. Appl.* **2019**, *35*, 268–279.

Nayarit (La: 21.8438765; Lo: -104.8714854)

Sarma, S.S.S.; Elías-Gutiérrez, M. Rotifers (Rotifera) from four natural bodies of central Mexico. *Limnologica* **1999**, *29*, 475–483.

Oaxaca (La: 17; Lo: -96.5)

Nigo A. J. Diversidad y densidad espacio temporal de rotíferos (Rotifera: Monogononta) en la Laguna Zapotengo, San Pedro Pochutla, Oaxaca. Master's thesis **2019**, Universidad del Mar, Oaxaca.

Puebla (La: 18.833333; Lo: -98)

Sarma, S.S.S.; Elguea-Sánchez, B.; Nandini, S. Effect of salinity on competition between the rotifers *Brachionus rotundiformis* Tschugunoff and *Hexarthra jenkiniae* (De Beauchamp) (Rotifera). *Hydrobiologia* **2002**, *474*, 183–188

Morales-Ventura, J.; Nandini, S.; Sarma, S.S.S.; Castellanos-Páez, M.E. Demography of zooplankton (*Anuraeopsis fissa*, *Brachionus rubens* and *Moina macrocopa*) fed *Chlorella vulgaris* and *Scenedesmus acutus* cultured on different media. *Rev. Biol. Trop.* **2012**, *60* (3), 955–965.

Ciros-Pérez, J.; Ortega-Mayagoitia E.; Alcocer, J. The role of ecophysiological and behavioral traits in structuring the zooplankton assemblage in a Deep, oligotrophic, tropical lake. *Limnology and Oceanography* **2015**, 60, 2158–2172.

Quintana Roo (La: 19.6666671; Lo: -88.5000001)

Sarma, S.S.S.; Elías-Gutiérrez, M. A survey on the rotifer (Rotifera) fauna of the Yucatan Peninsula (Mexico). *Rev. Biol. Trop.* **1999**, 47, 187–196.

Cervantes-Martínez, A.; Gutiérrez-Aguirre, M.A.; Elías-Gutiérrez, M.; Arce-Ibarra, A.M.; García-Morales, A. Aquatic biodiversity in cenotes from the Yucatan Peninsula (Quintana Roo, Mexico). *Teoría y Praxis* **2018**, 25, 49–68.

Arroyo-Castro, J.L.; Alvarado-Flores, J.; Uh-Moo, J.C.; Koh-Pasos, C.G. Monogonont rotifers species of the island Cozumel, Quintana Roo, México. *Biodiversity Data Journal* **2019**, 7, e34719.

Alvarado-Flores, J.; Arroyo-Castro, J.L.; Chavez-Flores L.; Marin-Chan, A.G. Spatial distribution overview of rotifers in the Yucatán península, México. *Environmental Management & Conservation* **2021**, 7, 1879450.

San Luis Potosi (La: 22.5000001; Lo: -100.4949145)

Walsh, E.J.; Schröder, T.; Wallace, R.L.; Ríos-Arana, J.V.; Rico-Martínez, R. *Saline Systems* **2008**, 4, 7.

Sarma, S.S.S., Jiménez-Santos, M.A.; Nandini, S.; Wallace, R.L. Review on the ecology and taxonomy of sessile rotifers (Rotifera) with special reference to Mexico. *Journal of Environmental Biology* **2020**, 41, 3–12.

Sinaloa (La: 25.0000001; Lo: -107.5000001)

Rico-Martínez, R.; Silva-Briano, M. Contribution to the knowledge of the rotifera of Mexico. *Hydrobiologia* **1993**, 255/256, 467–474.

Sonora (La: 29.3333331; Lo: -110.6666671)

Örstan, A. A new species of bdelloid rotifer from Sonora, Mexico. *The Southwestern Naturalist* **1995**, 40: 255–258.

State of Mexico (La: 19.4839446; Lo: -99.6899716)

Ramírez-García, P.; Nandini, S.; Sarma, S.S.S.; Robles-Valderrama, E.; Cuesta, I.; Hurtado-Maria, D. Seasonal variations of zooplankton abundance in the freshwater reservoir Valle de Bravo (Mexico). *Hydrobiologia* **2002**, 467, 99–108.

Serranía-Soto, C.; Sarma, S.S.S. Some taxonomical aspects of Rotifera from Central Mexico. *Scientia Naturae* **2003**, 6, 53–61.

Sarma, S.S.S.; Serranía-Soto, C.; Nandini, S. *Diversidad de rotíferos*. In: Ceballos, G. R. (Coord.). *La diversidad biológica del Estado de México*. Gobierno del Estado de México y Comisión Nacional para el Conocimiento y Uso de la Biodiversidad (CONABIO). México. **2009**.

Sarma, S.S.S.; Osnaya-Espinosa, L.R.; Aguilar-Acosta, C.R.; Nandini, S. Seasonal variations in zooplankton abundances in the Iturbide reservoir (Isidro Fabela, State of Mexico, Mexico). *J. Environ. Biol.* **2011**, *32*, 473–480.

Muñoz-Colmenares, M.E.; Sarma, S.S.S.; Nandini, S. Seasonal variation of rotifers from the high altitude Llano reservoir (State of Mexico, Mexico). *Journal of Environmental Biology* **2017**, *38*, 1171–1181.

García-García, G.; Nandini, S.; Sarma, S.S.S.; Martínez-Jerónimo, F.; Jiménez-Contreras, J. Impact of chromium and aluminium pollution on the diversity of zooplankton: a case study in the Chimaliapan wetland (Ramsar site) (Lerma basin, Mexico). *Journal of Environmental Science and Health, Part. A.* **2012**, *47*, 534–547.

Moreno-Gutiérrez, R. M.; Sarma, S.S.S.; Sobrino-Figueroa, A.S.; Nandini, S. Population growth potential of rotifers from a high altitude eutrophic waterbody, Madín reservoir (State of Mexico, Mexico): The importance of seasonal sampling. *J. Limnol.* **2018**, *77* (3), 441–451.

Espinosa-Rodríguez, C.A.; Sarma, S.S.S.; Nandini, S. Zooplankton community changes in relation to different macrophyte species: Effects of *Egeria densa* removal. *Ecohydrology & Hydrobiology.* **2021**, *21*, 153–163.

Tabasco (La: 17.9507864; Lo: -92.4831221)

Rico-Martínez, R.; Silva-Briano, M. Contribution to the knowledge of the rotifera of Mexico. *Hydrobiologia* **1993**, 255/256, 467–474.

Sarma, S.S.S.; Nandini, S.; Ramírez-García, P.; Cortés-Muñoz, J.E. New records of brackish water Rotifera and Cladocera from Mexico. *Hidrobiológica* **2000**, *10* (2), 121–124.

Tlaxcala (La: 19.416667; Lo: -98.166667)

Serranía-Soto, C.; Sarma, S.S.S. Some taxonomical aspects of Rotifera from Central Mexico. *Scientia Naturae* **2003**, *6*, 53–61.

Veracruz (La: 19.333333; Lo: -96.666667)

Serranía-Soto, C.; Sarma, S.S.S. Some taxonomical aspects of Rotifera from Central Mexico. *Scientia Naturae* **2003**, *6*, 53–61.

Castellanos-Páez, M.E.; Garza-Mouriño, G.; Ferrara-Guerrero, M.deJ. Rotifera (Rotifera) of Sontecomapan, Veracruz, a coastal lagoon of Mexico. *Scientiae Naturae* **2005**, *7* (2), 11–19.

Fontaneto, D.; Herniou, E.A.; Barraclough, T.G.; Ricci, C. On the Global Distribution of Microscopic Animals: new worldwide data on Bdelloid rotifers. *Zoological Studies* **2007**, *46* (3), 336–346.

Nandini, S.; Sarma, S.S.S.; Gulati, R.D. A seasonal study reveals the occurrence of exotic rotifers, The River Antigua, Veracruz, close to the Gulf of Mexico. *River. Res. Appl.* **2017**, *33*, 970–982.

Nandini, S.; Sarma, S.S.S. Adaptive toe morphology of *Euchlanis* cf. *mikropous* Koch-Althaus, 1962 (Rotifera: Euchlanidae) exposed directly and indirectly to invertebrate predators. *Limnologia* **2019**, *78*, 125693 <https://doi.org/10.1016/j.limno.2019.125693>

Yucatán (La: 20.6845957; Lo: -88.8755669)

Alvarado-Flores, J.; Arroyo-Castro, J.L.; Chavez-Flores L.; Marin-Chan, A.G. Spatial distribution overview of rotifers in the Yucatán peninsula, México. *Environmental Management & Conservation* **2021**, 7, 1879450.

Zacatecas (La: 23.0823582; Lo: -103.2085698)

Rico-Martínez, R.; Silva-Briano, M. Contribution to the knowledge of the rotifera of Mexico. *Hydrobiologia* **1993**, 255/256, 467–474.

Delgado-Saucedo, J. J.; Silva-Briano, M.; Sigala-Rodríguez, J.J. *Rotíferos*. In: *La biodiversidad en Zacatecas*. Estudio de Estado. Comisión Nacional para el Conocimiento y Uso de la Biodiversidad (CONABIO) y Gobierno del Estado de Zacatecas. 2020. México. 2020.
